# Supplementary material
Source: PubMed Central journal article supplement (PMC6779498)

# Supplementary Figure S1

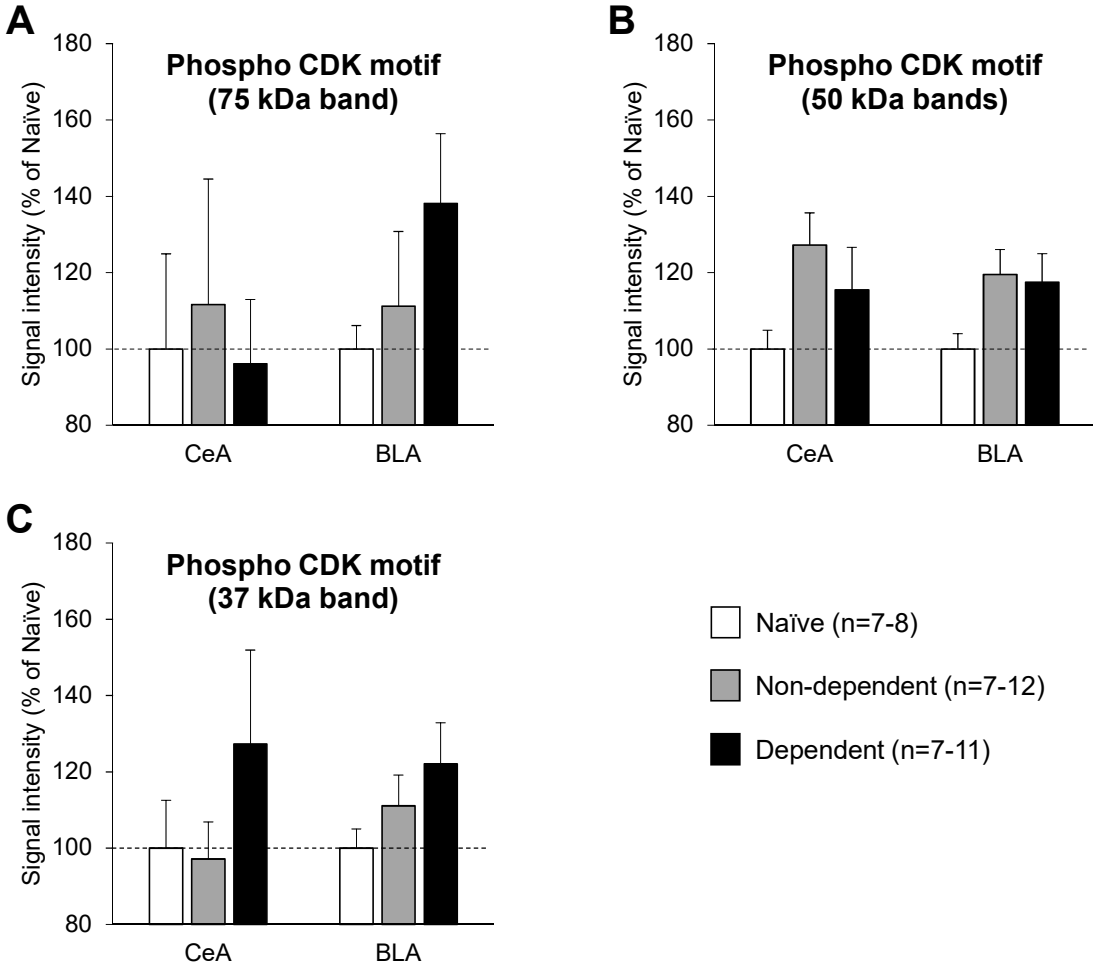

Supplement: NIHMS1045977-supplement-Supp_FigS1.pdf [file NIHMS1045977-supplement-Supp_FigS1.pdf]
